1  
2  
3  
4  
5  
6  
7  
8  
9  
10  
11  
12  
13  
14  
15  
16  
17  
18  
19  
20  
21  
22  
23  
24  
25  
26

**Associations Between Menstrual Cycle Phases and Heart Rate, Well-Being, and Perceived  
Exertion in Female Football Players**

Lucie Lipková<sup>1¶\*</sup>, Michaela Beníčková<sup>2&</sup>, Adam Wagner<sup>1&</sup> and Michal Kumstát<sup>1¶</sup>

<sup>1</sup>Department of Sport Performance and Exercise Testing, Faculty of Sports Studies, Masaryk  
University, Brno, Czech Republic

<sup>2</sup>Department of Physical Activities and Health Sciences, Faculty of Sports Studies, Masaryk  
University, Brno, Czech Republic

**\*Corresponding author**

E-mail: [451171@muni.cz](mailto:451171@muni.cz)

## 27 Abstract

28 This study aimed to investigate potential associations between menstrual cycle (MC) phases  
29 and heart rate (HR), perceived exertion (RPE), and subjective well-being in female football players.  
30 Data were collected from 11 players (aged 17–29 years) across 10 competitive matches. HR metrics,  
31 subjective well-being, and RPE were monitored in the pre-match, during-match, and post-match  
32 periods, as was the menstrual cycle in detail. Key findings revealed that during the early luteal (EL)  
33 phase, players spent significantly more time in moderate-intensity HR zones (Zone 4) in both the first  
34 ( $p = 0.046$ ) and second halves ( $p = 0.051$ ), while spending less time in high-intensity zones (Zone 5)  
35 during the first half ( $p = 0.012$ ). Subjective measures highlighted elevated energy levels in the EL phase  
36 compared to the late luteal phase ( $p = 0.001$ ), underscoring the influence of different menstrual cycle  
37 phases on well-being. However, RPE and maximum HR were predominantly shaped by external factors  
38 such as opponent strength ( $p < 0.001$ ) and match outcome ( $p = 0.035$ ). These results underscore the  
39 importance of exploring individual and contextual factors in understanding performance and well-  
40 being in female football players.

41 **Keywords:** female athletes; soccer; ovarian cycle; performance; subjective exertion

## 42 Introduction

43 The participation of women in sports has grown significantly, as demonstrated by the recent  
44 Olympic Games, which for the first time featured equal representation of male and female athletes  
45 [1]. This trend is particularly evident in women's football, where the number of officially ranked teams  
46 increased from 142 in 2020 to a record 192 by December 2023, highlighting the expanding global  
47 influence of women in the sport [2].

48 Dr. Georgie Bruinvels, a FIFA expert on female sports performance, has emphasized the  
49 untapped potential of female athletes: “We still do not know how good females can be. Understanding

50 how to better work with female athletes may unlock new potential, making it an exciting time for  
51 women’s football” [3]. This statement highlights the importance of understanding the unique  
52 physiological factors that influence female athletes, particularly those that may affect performance on  
53 the field.

54 Performance variability in female soccer players can be influenced by numerous factors,  
55 including environmental conditions, surface, quality of the opposition, level of competition, team  
56 tactics, nutrition, and sleep [4,5]. Among the most frequently discussed factors influencing  
57 performance in female athletes is the menstrual cycle (MC), which involves fluctuations in important  
58 hormones such as oestrogen, progesterone, luteinizing hormone, and follicle-stimulating hormone [6].  
59 The MC, typically lasting 21–35 days, is divided into the follicular and luteal phases, separated by  
60 ovulation. During the follicular phase, oestrogen levels rise as ovarian follicles mature, peaking before  
61 ovulation. In the luteal phase, both oestrogen and progesterone levels increase, with a secondary  
62 oestrogen peak in the mid-luteal phase, followed by a decline if fertilization does not occur, leading to  
63 menstruation [7,8].

64 These hormonal changes interact with various physiological systems, such as the  
65 cardiovascular, respiratory, metabolic, neuromuscular, and immune functions, and can also affect  
66 perceptual responses such as sleep quality, fatigue, and mood [9]. Additionally, thermoregulatory and  
67 metabolic processes are influenced, affecting exercise performance through mechanisms like fluid  
68 retention, changes in body temperature, and alterations in energy metabolism [10,11]. As a result, the  
69 MC can influence both sports performance and overall well-being in female football players [12], but  
70 evidence on the MC's impact on sports performance, particularly in women's football, remains limited  
71 and inconsistent [5,13]. Given these mixed findings, it is recommended that athletes and practitioners  
72 monitor MCs and symptoms to tailor training and competition strategies, ultimately improving  
73 performance and well-being [5]. Understanding the dynamics of the MC is crucial for enhancing both  
74 performance and well-being in female football players.

75            This study aims to investigate potential associations between of MC phases and heart rate,  
76            perceived exertion, and subjective well-being in female football players. By examining these variables,  
77            the research seeks to provide insights that could inform the development of training programs and  
78            competition strategies tailored to the specific needs of female athletes, ultimately enhancing their  
79            performance and health.

## 80            **Methods**

### 81            **Participants**

82            The study initially involved 12 female football players from the Czech Women's Football  
83            League. One player was excluded based on the inclusion criteria (age >15, absence of injuries, non-use  
84            of oral contraception, regular MC). The final sample consisted of 11 players (aged 17–29 years),  
85            including 2 attackers, 5 midfielders, and 4 defenders. Data collection took place from April to June  
86            2024, encompassing 10 official matches. Measurements were taken before, during, and after each  
87            match. All participants provided written informed consent, and for participants under the age of 18,  
88            consent was also obtained from their parents or legal guardians. The study protocol was approved by  
89            the Ethical Committee (EKV-2024-001).

### 90            **Design**

91            This study examined the effects of different MC phases on heart rate, perceived exertion, and  
92            subjective well-being in female football players. The research protocol included three assessment  
93            stages: pre-match, during the match, and post-match.

- 94            • Pre-match: Participants completed a subjective wellness questionnaire 1–2 hours before each  
95            match.
- 96            • During-match: Players' heart rate (HR) was monitored using wearable sensors throughout the  
97            match.

98       • Post-match: Participants reported their rate of perceived exertion (RPE) and evaluated the  
99       strength of the opponent immediately after the match. Additionally, match outcome and  
100       location were recorded to capture relevant contextual factors.

101 All questionnaires were administered digitally via Microsoft Forms on participants' mobile devices. At  
102 the end of the season, an additional comprehensive questionnaire was used to collect detailed  
103 information about participants' MCs.

## 104 **Pre-match Assessment**

### 105 **Subjective Wellness Questionnaire**

106       Participants completed a subjective wellness questionnaire (S1 Table) prior to each match to  
107       assess their overall well-being based on the previous day's exertion. The questionnaire covered six  
108       factors (energy levels, sleep quality, muscle soreness, diet quality, and stress levels), adapted from  
109       McGahan et al. [14]. Each item was rated on a five-point Likert scale, where 1 indicated poor well-being  
110       and 5 indicated excellent well-being.

## 111 **During-match Assessment**

### 112 **Heart Rate Monitoring**

113       HR data were collected using the Polar H10 heart rate monitor, integrated with the Polar Team  
114       app. The Polar H10 is widely validated and recognized as a gold standard for R-R interval assessments  
115       [15,16]. Measurements were recorded throughout the match, including both halves. The key  
116       cardiovascular metrics captured were maximal heart rate ( $HR_{max}$ ), mean heart rate, and time spent in  
117       the following heart rate zones:

- 118               • Zone 1 (Very light): 50–60% of  $HR_{max}$
- 119               • Zone 2 (Light): 60–70% of  $HR_{max}$
- 120               • Zone 3 (Moderate): 70–80% of  $HR_{max}$

- 121 • Zone 4 (Hard): 80–90% of  $HR_{max}$
- 122 • Zone 5 (Maximum): 90–100% of  $HR_{max}$  [17].

123  $HR_{max}$  was determined as the highest value reached across all recorded data during the  
124 matches [18]. This approach was chosen because it reflects the players' peak physiological response  
125 under real match conditions, which is more relevant for assessing in-game performance than values  
126 obtained in a controlled test environment.

## 127 **Post-match Assessment**

### 128 **Rate of Perceived Exertion (RPE)**

129 After each match, participants rated their perceived exertion using a modified category-ratio  
130 scale (CR-10 scale), which combines categorical labels with a numerical range (1–10) to quantify  
131 perceived exertion. This scale has been validated and shown to be reliable in monitoring training load  
132 across various sports [19,20]. The scale (S2 Table) included descriptive labels and smiley faces, with  
133 ratings ranging from 1 (lightest possible exertion) to 10 (most strenuous exertion). Ratings were  
134 collected 30–60 minutes after the match.

### 135 **Opponent Strength, Match Outcome, and Location**

136 Participants were asked to subjectively evaluate the strength of the opponent after the match,  
137 classifying them as weak, medium, or strong, with responses recorded 30–60 minutes after the match  
138 via questionnaire. Additionally, match outcome (win, loss, or draw) and match location (home or away)  
139 were documented to account for potential contextual factors influencing the players' performance and  
140 perceived exertion.

### 141 **Comprehensive Menstrual Cycle Questionnaire**

142 At the end of the season, participants completed a comprehensive questionnaire (S1  
143 Appendix), which included questions about cycle regularity, the duration of the bleeding phase, and

144 the use of oral contraception. Participants also provided information based on their personal  
145 calendars, indicating the days of their bleeding phase from March to June. This data was used to  
146 accurately calculate the MC phases and ensure eligibility for the study.

## 147 **Menstrual Cycle Phase Calculation**

148 The specific MC phases were identified by tracking the onset of menstrual bleeding over the  
149 course of 3 to 4 consecutive cycles for each participant (Table 1).

150 **Table 1: Classification of Menstrual Cycle Phases Based on Forward and Backward Day Count**

| Phase            | Abbreviation | Day of the menstrual cycle |                |
|------------------|--------------|----------------------------|----------------|
|                  |              | Forward count              | Backward count |
| Early follicular | EF           | 1–5                        | –              |
| Mid-follicular   | MF           | from day 6                 | until day -16  |
| Peri-ovulatory   | PO           | –                          | -15 to -12     |
| Early luteal     | EL           | –                          | -11 to -10     |
| Mid-luteal       | ML           | –                          | -9 to -5       |
| Late luteal      | LL           | –                          | -4 to -1       |

158 The Early Follicular (EF) phase was indicated by the onset of menstrual bleeding and lasted  
159 until day 5 of the MC, as described by Elliott-Sale et al. [7]. The Peri-ovulatory (PO) and Mid-luteal (ML)  
160 phases were calculated using the counting method outlined by Schmalenberger et al. [8]. Both phases  
161 were identified by backward-counting from the first day of the subsequent menstrual bleeding, with  
162 the PO corresponding to days -15 to -12, and the ML corresponding to days -9 to -5. The Mid-follicular  
163 (MF), Early Luteal (EL), and Late Luteal (LL) phases were assigned to the remaining days of the MC. The  
164 MF phase follows the EF phase, beginning on day 6 of the MC and lasting until day -16 (inclusive). The  
165 EL phase occurred between the PO and ML phases (days -11 to -10), while the LL phase fell between  
166 the ML and EF phases (days -4 to -1).

## 167 **Statistical Analysis**

168 Data were analysed using Python within the PyCharm CE IDE. Descriptive statistics were  
169 calculated for all variables. Normality was assessed by examining residual histograms, and  
170 homogeneity of variance was evaluated by plotting residuals against predicted values. Linear mixed-  
171 effects models were employed to evaluate the effects of MC phases and match-related variables (e.g.,  
172 match location, opposition strength, match result) on dependent measures such as heart rate and  
173 subjective wellness scores. Models were estimated using maximum likelihood (ML). The first model  
174 assessed heart rate data (maximal heart rate, mean heart rate, and time spent in heart rate zones 1–  
175 5), while the second model focused on subjective metrics (mood, sleep, energy, muscle soreness, diet,  
176 stress, and RPE). Both models included fixed effects for MC phase, match result, match location, and  
177 opposition quality, with random effects for participant ID to account for repeated measures. Post-hoc  
178 comparisons were performed with Holm-Bonferroni corrections to identify significant differences  
179 between phases. Pairwise comparisons of residuals from the mixed models were conducted across  
180 different MC phases. Effect sizes were estimated using omega squared ( $\omega^2$ ) and were interpreted as  
181 small ( $\omega^2 = 0.01$ ), medium ( $\omega^2 = 0.06$ ), and large ( $\omega^2 = 0.14$ ) [21].

## 182 **Results**

### 183 **Basic Demographics**

184 The basic demographic characteristics of the participants are summarized in Table 2. All  
185 players reported having a regular MC, with an average cycle length of 28.5 days and a bleeding duration  
186 of 5.5 days.

187 **Table 2: Descriptive characteristics of the players**

| N = 11 | Age (year) | Weight (kg) | Height (cm) | Age of sport specialization (year) | Menstrual cycle length (days) | Length of Bleeding (days) |
|--------|------------|-------------|-------------|------------------------------------|-------------------------------|---------------------------|
|--------|------------|-------------|-------------|------------------------------------|-------------------------------|---------------------------|



|         |      |      |       |      |      |     |
|---------|------|------|-------|------|------|-----|
| Average | 21.5 | 61.4 | 166.9 | 11.1 | 28.5 | 5.5 |
| SD      | 3.8  | 8.7  | 5.3   | 4.5  | 2.02 | 1.4 |

188

## 189 Heart Rate Responses Across Menstrual Cycle Phases

190 The results for HR variables are displayed in Table 3, with comparisons based on match  
 191 location, result, and opponent strength, and significant differences detailed in Table 4. Time spent in  
 192 HR Zone 4 was significantly higher in the EL phase during both the first ( $p = 0.046$ ,  $\omega^2 = 0.158$ ) and  
 193 second halves ( $p = 0.051$ ,  $\omega^2 = 0.139$ ). In contrast, time spent in HR Zone 5 in the first half was lower in  
 194 the EL phase ( $p = 0.012$ ,  $\omega^2 = 0.091$ ). Post-hoc tests revealed that the EL phase significantly differed  
 195 from the LL ( $p = 0.0491$ ), MF ( $p = 0.0134$ ), and PO phases ( $p = 0.019$ ) in time spent in HR Zone 4 – 1st  
 196 half. Time spent in HR Zone 1 showed significant differences based on opponent strength. Players  
 197 spent less time in HR Zone 1 during both halves when facing stronger opponents (1st half:  $p = 0.006$ ;  
 198 2nd half:  $p = 0.037$ ), indicating a higher overall workload in these matches. No other significant  
 199 differences were identified for the remaining HR parameters across MC phases.

200 **Table 3: Heart Rate Metrics During the First and Second Halves Across Different MC Phases**

| Variable (mean±SD)     | EF        | MF        | PO        | EL        | ML        | LL        | Home/out (p-value) | Result (p-value) | Opponent Strength (p-value) |
|------------------------|-----------|-----------|-----------|-----------|-----------|-----------|--------------------|------------------|-----------------------------|
| HR Max % - 1st half    | 97.3±2.01 | 97.6±2.01 | 97.3±1.69 | 96.5±1.84 | 96.7±2.66 | 96.4±1.59 | 0.358              | 0.134            | 0.246                       |
| HR Avg % - 1st half    | 83.0±5.46 | 82.8±7.55 | 83.2±5.41 | 84.9±2.99 | 84.3±3.94 | 85.2±2.06 | 0.507              | 0.727            | 0.905                       |
| HR zone 1 % - 1st half | 2.0±3.27  | 2.6±3.77  | 1.1±1.09  | 2.4±3.95  | 3.5±6.15  | 1.9±2.51  | 0.249              | 0.171            | 0.006*                      |
| HR zone 2 % - 1st half | 4.3±6.32  | 5.0±4.72  | 3.3±2.88  | 2.0±1.0   | 4.2±3.0   | 2.3±1.3   | 0.705              | 0.687            | 0.899                       |

|                              |            |            |            |            |            |            |        |       |        |
|------------------------------|------------|------------|------------|------------|------------|------------|--------|-------|--------|
| HR zone 3<br>% - 1st half    | 11.9±8.92  | 9.9±8.60   | 14.6±11.32 | 8.9±2.5    | 11.3±9.7   | 8.8±5.85   | 0.848  | 0.464 | 0.085  |
| HR zone 4<br>% - 1st half    | 40.8±11.50 | 33.7±13.68 | 32.6±7.87  | 55.7±10.26 | 41.8±11.77 | 35.2±13.36 | 0.122  | 0.482 | 0.652  |
| HR zone 5<br>% - 1st half    | 41.0±17.06 | 48.8±22.92 | 48.4±14.67 | 31.0±8.08  | 39.2±16.34 | 51.6±13.70 | 0.302  | 0.288 | 0.294  |
| HR Max % -<br>2nd half       | 95.9±2.11  | 97.1±1.85  | 96.4±2.00  | 96.7±2.51  | 96.1±1.68  | 96.5±1.68  | 0.030* | 0.549 | 0.157  |
| HR Avg % -<br>2nd half       | 81.8±6.1   | 83.3±6.14  | 81.0±5.53  | 84.39±2.56 | 84.1±3.88  | 84.0±3.97  | 0.492  | 0.061 | 0.960  |
| HR zone 1<br>% - 2nd<br>half | 2.4±2.37   | 3.8±4.78   | 3.7±4.55   | 2.9±5.60   | 3.6±4.79   | 3.2±3.58   | 0.922  | 0.980 | 0.037* |
| HR zone 2<br>% - 2nd<br>half | 5.8±7.93   | 4.1±4.89   | 3.9±4.81   | 3.0±0.94   | 4.5±4.57   | 3.3±4.30   | 0.671  | 0.537 | 0.240  |
| HR zone 3<br>% - 2nd<br>half | 16.2±10.79 | 14.5±10.52 | 15.5±6.27  | 11.4±6.27  | 14.5±8.25  | 11.3±6.41  | 0.208  | 0.833 | 0.808  |
| HR zone 4<br>% - 2nd<br>half | 42.3±12.92 | 37.2±12.31 | 37.3±11.22 | 52.5±2.71  | 46.1±8.87  | 43.4±12.35 | 0.736  | 0.081 | 0.444  |
| HR zone 5<br>% - 2nd<br>half | 33.2±19.49 | 40.6±22.13 | 39.7±16.81 | 30.2±8.00  | 31.3±12.83 | 38.9±12.04 | 0.435  | 0.202 | 0.459  |

201 Statistically significant p-values ( $p < 0.05$ ) are marked with \*. HR<sub>max</sub> %: percentage of heart rate relative  
 202 to the highest HR<sub>max</sub> achieved across all matches, HR Avg %: percentage of average heart rate, SD: standard  
 203 deviation, %zone: time spent in heart rate zone. EF: Early Follicular phase, MF: Mid Follicular phase, PO: Peri-  
 204 Ovulatory phase, EL: Early Luteal phase, ML: Mid Luteal phase, LL: Late Luteal phase.

205 **Table 4: Statistical Analysis of HR Zone Differences in Female Football Players**

| HR Zone              | Comparison of MC Phases | p-value | Omega Squared |
|----------------------|-------------------------|---------|---------------|
| HR Zone 4 - 1st half | EL vs EF                | 0.036*  | 0.158*        |

|                      |                         |        |        |
|----------------------|-------------------------|--------|--------|
|                      | EL vs MF                | 0.001* | 0.158* |
|                      | EL vs PO                | 0.010* | 0.158* |
|                      | EL vs ML                | 0.046* | 0.158* |
|                      | EL vs LL                | 0.023* | 0.158* |
| HR Zone 5 - 1st half | EL vs MF                | 0.012* | 0.091  |
|                      | EL vs LL                | 0.056  | 0.091  |
| HR Zone 4 - 2nd half | EL vs MF                | 0.056  | 0.139  |
|                      | LL vs MF                | 0.051  | 0.139  |
| HR Max % - 2nd half  | Home vs Away            | 0.030* | 0.166* |
| HR Zone 1 - 1st half | Strong vs Weak Opponent | 0.006* | 0.086  |
| HR Zone 1 - 2nd half | Strong vs Weak Opponent | 0.037* | 0.059  |

206 Statistically significant p-values ( $p < 0.05$ ) are marked with \* . Strong effect sizes ( $\omega^2 > 0.14$ ) are also  
 207 marked with \* . EF: Early Follicular phase, MF: Mid Follicular phase, PO: Peri-Ovulatory phase, EL: Early Luteal  
 208 phase, ML: Mid Luteal phase, LL: Late Luteal phase.

## 209 Subjective Responses Across Menstrual Cycle Phases

210 The results for subjective response variables are displayed in Table 5, with significant  
 211 differences detailed in Table 6. Significant differences were found in sleep ( $p = 0.041$ ,  $\omega^2 = 0.106$ ),  
 212 energy ( $p = 0.003$ ,  $\omega^2 = 0.136$ ), and stress ( $p = 0.033$ ,  $\omega^2 = 0.103$ ). Post-hoc tests revealed that energy  
 213 levels in the EL phase were significantly higher compared to the LL phase ( $p = 0.0205$ ). Opponent  
 214 strength significantly impacted RPE, with players reporting significantly higher perceived exertion  
 215 against stronger opponents ( $p < 0.001$ ,  $\omega^2 = 0.222$ ). No significant differences were found between the  
 216 different MC phases for RPE.

217 **Table 5: Subjective Response Variables Across Different MC Phases**

| Variable (mean±SD) | EF        | MF         | PO        | EL        | ML        | LL        | Home/ou<br>t<br>(p-value) | Result<br>(p-<br>value) | Opponen<br>t<br>Strength<br>(p-value) |
|--------------------|-----------|------------|-----------|-----------|-----------|-----------|---------------------------|-------------------------|---------------------------------------|
| Mood               | 3.39±0.96 | 3.66±0.67  | 3.77±0.44 | 3.75±0.50 | 3.56±0.53 | 3.50±0.86 | 0.355                     | 0.369                   | 0.338                                 |
| Sleep              | 2.31±0.86 | 2.84±0.789 | 3.00±0.58 | 3.25±0.96 | 2.89±0.78 | 3.00±0.88 | 0.127                     | 0.499                   | 0.813                                 |
| Energy             | 2.77±0.83 | 2.90±0.61  | 3.08±0.28 | 3.75±0.50 | 3.00±0.71 | 2.57±0.76 | 0.441                     | 0.457                   | 0.846                                 |
| Muscle<br>Soreness | 3.69±1.03 | 3.68±0.90  | 3.69±0.96 | 4.25±0.96 | 4.00±0.71 | 3.86±0.66 | 0.909                     | 0.463                   | 0.542                                 |
| Diet               | 2.77±0.83 | 2.84±0.92  | 3.23±0.83 | 3.25±0.50 | 2.89±1.05 | 2.86±0.95 | 0.679                     | 0.509                   | 0.493                                 |
| Stress             | 2.54±0.66 | 2.87±0.81  | 2.85±0.80 | 3.75±0.96 | 2.67±0.50 | 2.86±0.86 | 0.361                     | 0.775                   | 0.164                                 |
| RPE                | 6.00±1.35 | 6.18±1.63  | 5.85±0.90 | 6.00±1.63 | 5.67±2.00 | 6.50±1.61 | 0.599                     | 0.035*                  | 0.000*                                |

218 Statistically significant p-values ( $p < 0.05$ ) are marked with \*. SD: standard deviation, EF: Early Follicular  
 219 phase, MF: Mid Follicular phase, PO: Peri-Ovulatory phase, EL: Early Luteal phase, ML: Mid Luteal phase, LL: Late  
 220 Luteal phase. Wellness variables were rated on a scale from 1 (poor) to 5 (excellent), and RPE was rated on a  
 221 scale from 0 (no exertion) to 10 (maximum exertion).

222 **Table 6: Statistical analysis results of selected subjective response variables with significant differences in**  
 223 **female football players.**

| Variable | Comparison of MC Phases | p-value | Omega Squared |
|----------|-------------------------|---------|---------------|
| Sleep    | EF vs MF                | 0.041*  | 0.106         |
|          | EF vs PO                | 0.013*  | 0.106         |
|          | EF vs LL                | 0.028*  | 0.106         |
| Energy   | EL vs EF                | 0.003*  | 0.136*        |
|          | EL vs MF                | 0.004*  | 0.136*        |

|        |                         |          |        |
|--------|-------------------------|----------|--------|
|        | EL vs PO                | 0.056    | 0.136* |
|        | EL vs ML                | 0.017*   | 0.136* |
|        | EL vs LL                | 0.001*   | 0.136* |
|        | PO vs LL                | 0.035*   | 0.136* |
| Stress | EL vs EF                | 0.033*   | 0.103  |
|        | EL vs ML                | 0.057    | 0.103  |
| RPE    | Home vs Away            | 0.599    | 0.222* |
|        | Result (Win vs Lose)    | 0.035*   | 0.222* |
|        | Strong vs Weak Opponent | < 0.001* | 0.222* |

224 Statistically significant p-values ( $p < 0.05$ ) are marked with \*. Strong effect sizes (omega squared >  
 225 0.14) are also marked with \*. EF: Early Follicular phase, MF: Mid Follicular phase, PO: Peri-Ovulatory phase,  
 226 EL: Early Luteal phase, ML: Mid Luteal phase, LL: Late Luteal phase.

## 227 Discussion

228 This study investigated associations between the different phases of the MC and HR during  
 229 matches, as well as subjective well-being in female football players. A key finding (Fig 1) was that during  
 230 the EL phase, players were observed to spend more time in HR Zone 4 (moderate-intensity exercise)  
 231 and less time in HR Zone 5 (high-intensity exercise), while reporting higher energy levels. This suggests  
 232 that players may be better suited for moderate-intensity efforts during the EL phase, while their  
 233 capacity for high-intensity performance may be reduced. In contrast, no significant differences were  
 234 observed across the other MC phases, suggesting a limited and phase-specific impact of the menstrual  
 235 cycle on HR and subjective responses.

236 **Fig 1: Summary of findings**

## 237 **Heart Rate and Menstrual Cycle Phases in Female Football Players**

238 The observed HR responses may be associated with typical hormonal fluctuations, particularly the rise  
239 in progesterone and relatively elevated oestrogen levels during the EL phase. Progesterone is known  
240 to increase HR by elevating sympathetic nervous system activity, influencing vascular tone and  
241 potentially limiting the heart's ability to reach higher intensity HR zones [22]. Meanwhile, oestrogen's  
242 vasodilatory effects [23,24] improve aerobic performance by reducing peripheral resistance and  
243 increasing cardiac output, contributing to enhanced moderate-intensity performance during the EL  
244 phase. Based on our findings, differences in HR responses between MC phases may be linked to these  
245 hormonal variations, with players showing a preference for moderate-intensity efforts (HR Zone 4)  
246 during the EL phase, while time in high-intensity efforts (HR Zone 5) was reduced. Together, these  
247 hormonal effects suggest that the balance between progesterone and oestrogen during the luteal  
248 phase may optimize moderate-intensity performance while simultaneously challenging the ability to  
249 sustain high-intensity efforts. Further investigation into these mechanisms is needed to fully  
250 understand how progesterone and oestrogen interact to modulate HR during different phases of the  
251 MC [11].

252 These findings are consistent with previous research, which highlights increased  
253 cardiovascular load and HR during the luteal phase [25]. This makes it more difficult for athletes to  
254 achieve higher HR zones during submaximal exercise, corroborating our findings of increased time  
255 spent in HR Zone 4 during the EL phase. Similarly, enhanced moderate-intensity exercise capacity has  
256 been reported across various sports during the luteal phase, including football and futsal [22,26]. The  
257 consistency of these findings underscores the significant role of hormonal fluctuations in modulating  
258 cardiovascular and performance metrics during the MC.

259 However, not all studies align with these findings. Some research, such as McNulty et al. [27],  
260 found no significant differences in anaerobic capacity or maximal HR across MC phases, suggesting  
261 that while HR variability may be sensitive to hormonal changes, it does not always translate into  
262 differences in sprint or high-intensity performance. Wiecek (2019) [28] emphasized that cardiovascular

263 responses may vary with the MC, but their impact on performance is influenced by factors like fitness  
264 level, training adaptations, and the specific demands of the sport. This variability highlights the  
265 complexity of hormonal interactions across MC phases and the need for further research, particularly  
266 involving detailed hormonal profiling, to clarify the practical implications of MC phases on female  
267 football players' performance.

268 While hormonal fluctuations clearly play a significant role in modulating HR responses, our  
269 study also highlighted the influence of external factors, such as opponent strength and home  
270 advantage. Players spent less time in HR Zone 1 (low intensity) when competing against stronger  
271 opponents, indicating a higher overall workload in these matches. Additionally, HR<sub>max</sub> in the second  
272 half of matches was significantly higher when playing at home, which may reflect the psychological  
273 and environmental advantages of playing in familiar surroundings. Although differences in HR across  
274 MC phases were observed, no significant differences were found for HR<sub>max</sub> between phases. This  
275 suggests that maximum performance may be more influenced by external factors, such as match  
276 outcome or home advantage, than by MC phases alone. Overall, our findings highlight that the EL  
277 phase, alongside external factors, may play a significant role in modulating cardiovascular responses  
278 and performance in female football players.

## 279 **Subjective Responses Across Menstrual Cycle Phases**

280 In this study, significant differences in subjective responses were observed across MC phases,  
281 particularly in sleep, energy, and stress. Energy levels were higher during the EL phase compared to  
282 the LL phase, consistent with research linking hormonal changes, such as elevated oestrogen levels, to  
283 enhanced mood and energy [20]. Additionally, RPE was significantly impacted by external factors, with  
284 higher exertion reported when playing against stronger opponents and in matches that were lost.  
285 However, no significant differences in RPE were detected between the MC phases, suggesting that  
286 while certain subjective variables may vary across phases, perceived exertion is more responsive to  
287 the competitive context than by MC phases themselves.

## 288 **Energy Levels**

289 Energy levels fluctuated significantly across MC phases, with the lowest values reported during  
290 the LL and EF phases. These findings may reflect the influence of typical hormonal changes—  
291 particularly variations in oestrogen and progesterone—on serotonin levels, which play a key role in  
292 regulating mood and energy. The higher energy levels observed in the EL phase could be associated  
293 with elevated oestrogen levels during the late follicular phase, known to enhance serotonin  
294 transmission [20,29]. Although post-hoc tests did not confirm significant differences across all phases,  
295 the variation in energy levels may be due to individual hormone sensitivity or external factors affecting  
296 energy perception, such as the accuracy of menstrual cycle tracking.

## 297 **Sleep**

298 Sleep, another critical factor influencing well-being, also varies across the MC. Previous  
299 research shows that females are more prone to sleep disturbances than males, which can negatively  
300 affect athletic performance, increase perceived effort, and impair cognitive and motor function [29].  
301 In our study, sleep quality fluctuated across MC phases, with no significant differences found in post-  
302 hoc analyses. Some research suggests more sleep disturbances in the LL phase, while others report no  
303 significant differences in sleep, fatigue, or soreness across phases [30], highlighting the variability in  
304 the influence of the MC on sleep.

## 305 **Rate of Perceived Exertion (RPE)**

306 In our study, no significant differences in RPE were observed across MC phases, consistent  
307 with prior research [9]. Similarly, Abbott et al. [19] found no effect of MC phase on session RPE (sRPE)—  
308 which refers to the overall perceived exertion for an entire training session—or external load during  
309 matches. Although it has been hypothesized that rising progesterone levels during the luteal phase  
310 may increase perceived effort, our findings did not support this assumption, aligning with other studies  
311 [31,32].

312 However, some studies do report higher sRPE during the luteal phase, particularly for longer  
313 or more intense activities. For instance, sRPE was found to be higher for distances over 5 km during



314 the luteal phase compared to menstruation, and players reported greater fatigue 48 hours post-match  
315 in the luteal phase than in the follicular phase [30]. This variation suggests that while MC phases may  
316 not significantly influence perceived effort during shorter or less intense activities, they could play a  
317 more pronounced role in longer, more demanding exercises.

318 As expected, RPE in our study was significantly influenced by external factors, with higher  
319 perceived exertion reported when playing against stronger opponents and in matches that were lost.  
320 These findings underscore the interaction between external variables and perceived effort,  
321 highlighting that match conditions and exertion demands may have a more pronounced impact than  
322 the MC phases themselves.

### 323 **Stress and Other Well-Being Factors**

324 Although stress levels varied across MC phases—peaking during the EF and ML phases and  
325 lowest during the EL phase—post-hoc tests did not confirm significant differences. This suggests that  
326 while there may be fluctuations in stress associated with hormonal changes, our findings did not  
327 provide strong evidence to support this relationship. Previous research has linked hormonal  
328 fluctuations to mood and stress regulation [20]. Other well-being factors, including mood, muscle  
329 soreness, and diet, showed no significant phase-related differences.

330 The luteal phase is often associated with premenstrual syndrome (PMS), characterized by  
331 symptoms like sleep disturbances, anxiety, fatigue, and water retention that negatively affect well-  
332 being [29]. Increased progesterone during this phase may contribute to mood disturbances and muscle  
333 soreness due to alterations in neurotransmitter systems and amino acid metabolism [30]. Our study  
334 found that pre-match well-being did not significantly affect match outcomes or perceptions of  
335 opponent strength, indicating that subjective feelings before the match had no influence on  
336 performance or opponent perception.

### 337 **Practical Application**

338 This study emphasizes the complex interplay between MC phases, external factors, and  
339 performance in female football players. While associations between the early luteal phase and

340 moderate-intensity efforts were observed, future research should investigate potential causal links.  
341 Practical strategies could involve monitoring MC phases to inform individualized training adaptations  
342 during the EL phase, particularly for moderate-intensity efforts. Additionally, external situational  
343 factors, such as opponent strength and match demands, should guide recovery and load management  
344 to support optimal performance.

## 345 **Limitations**

346 This study relied on calendar-based tracking to estimate MC phases, without objective  
347 hormonal measurements. As a result, we could not distinguish between ovulatory and anovulatory  
348 cycles or luteal phase deficiencies, potentially introducing variability into the findings [33]. Given the  
349 high activity levels of our participants, it is likely that some experienced anovulatory or luteal phase-  
350 deficient cycles despite regular menstruation [11]. In such cases, hormone levels, particularly  
351 progesterone, would remain low [7,11]. This highlights the need for hormonal profiling in future  
352 research to improve accuracy.

353 Additionally, football performance is shaped by numerous external factors, such as pitch  
354 quality, player position, weather, team tactics, and psychological stress. These variables, along with  
355 match-specific elements like opponent strength and injuries, add significant variability to both  
356 performance and perceived exertion. These complexities underscore the challenge of assessing  
357 physiological responses in live football settings and should be considered when interpreting results.

## 358 **Conclusion**

359 This study highlights the combined influence of MC phases and external factors on  
360 performance and well-being in female football players. While the EL phase was associated with  
361 improved moderate-intensity performance and higher energy levels, external factors, such as  
362 opponent strength and match outcomes, had a more pronounced effect on low intensity performance,  
363 maximum HR and RPE. These findings emphasize the need to integrate both internal physiological  
364 states and situational demands into training and performance strategies. By leveraging an ecologically

365 valid approach, this research provides actionable insights to optimize performance in real-world  
366 conditions.

## 367 **References**

- 368 1. IOC. Gender equality through time: at the Olympic Games. 2024. Available:  
369 <https://olympics.com/ioc/gender-equality/gender-equality-through-time>
- 370 2. FIFA Ranking. Women's World Ranking. 2024. Available: [https://inside.fifa.com/origin1904-](https://inside.fifa.com/origin1904-p.cxm.fifa.com/fifa-world-ranking/women)  
371 [p.cxm.fifa.com/fifa-world-ranking/women](https://inside.fifa.com/origin1904-p.cxm.fifa.com/fifa-world-ranking/women)
- 372 3. FIFA. A special year for women's football. Available: [https://inside.fifa.com/womens-](https://inside.fifa.com/womens-football/news/origin1904-p.cxm.fifa.com/a-special-year-for-womens-football)  
373 [football/news/origin1904-p.cxm.fifa.com/a-special-year-for-womens-football](https://inside.fifa.com/womens-football/news/origin1904-p.cxm.fifa.com/a-special-year-for-womens-football)
- 374 4. Fullagar HHK, Skorski S, Duffield R, Hammes D, Coutts AJ, Meyer T. Sleep and athletic performance:  
375 the effects of sleep loss on exercise performance, and physiological and cognitive responses to  
376 exercise. *Sports Med.* 2015;45: 161–186. doi:10.1007/s40279-014-0260-0
- 377 5. Randell RK, Clifford T, Drust B, Moss SL, Unnithan VB, De Ste Croix MBA, et al. Physiological  
378 Characteristics of Female Soccer Players and Health and Performance Considerations: A  
379 Narrative Review. *Sports Med.* 2021;51: 1377–1399. doi:10.1007/s40279-021-01458-1
- 380 6. Hackney AC, editor. *Sex Hormones, Exercise and Women*. Cham: Springer International Publishing;  
381 2017. doi:10.1007/978-3-319-44558-8
- 382 7. Elliott-Sale KJ, Minahan CL, De Jonge XAKJ, Ackerman KE, Sipilä S, Constantini NW, et al.  
383 Methodological Considerations for Studies in Sport and Exercise Science with Women as  
384 Participants: A Working Guide for Standards of Practice for Research on Women. *Sports Med.*  
385 2021;51: 843–861. doi:10.1007/s40279-021-01435-8
- 386 8. Schmalenberger KM, Tauseef HA, Barone JC, Owens SA, Lieberman L, Jarczok MN, et al. How to  
387 study the menstrual cycle: Practical tools and recommendations. *Psychoneuroendocrinology.*  
388 2021;123: 104895. doi:10.1016/j.psyneuen.2020.104895
- 389 9. Paludo AC, Paravlic A, Dvořáková K, Gimunová M. The Effect of Menstrual Cycle on Perceptual  
390 Responses in Athletes: A Systematic Review With Meta-Analysis. *Front Psychol.* 2022;13: 926854.  
391 doi:10.3389/fpsyg.2022.926854
- 392 10. Draper CF, Duisters K, Weger B, Chakrabarti A, Harms AC, Brennan L, et al. Menstrual cycle  
393 rhythmicity: metabolic patterns in healthy women. *Sci Rep.* 2018;8: 14568. doi:10.1038/s41598-  
394 018-32647-0
- 395 11. Hackney AC, Constantini NW, editors. *Endocrinology of Physical Activity and Sport*. Cham: Springer  
396 International Publishing; 2020. doi:10.1007/978-3-030-33376-8
- 397 12. Bruinvels G, Hackney AC, Pedlar CR. Menstrual Cycle: The Importance of Both the Phases and the  
398 Transitions Between Phases on Training and Performance. *Sports Med.* 2022;52: 1457–1460.  
399 doi:10.1007/s40279-022-01691-2

- 400 13. Hamed-Hamed D, González-Muñoz A, Cuevas-Cervera M, Perez-Montilla JJ, Aguilar-Nuñez D,  
401 Aguilar-García M, et al. Effects of the menstrual cycle on the performance of female football  
402 players. A systematic review. *Front Physiol.* 2024;15. doi:10.3389/fphys.2024.1359953
- 403 14. Mcgahan J, Burns C, Lacey S, Gabbett T, O'Neill C. VARIATION IN TRAINING LOAD AND MARKERS  
404 OF WELLNESS. *JASC;* 2019;7(03):6-14.
- 405 15. Gilgen-Ammann R, Schweizer T, Wyss T. RR interval signal quality of a heart rate monitor and an  
406 ECG Holter at rest and during exercise. *Eur J Appl Physiol.* 2019;119: 1525–1532.  
407 doi:10.1007/s00421-019-04142-5
- 408 16. Speer KE, Semple S, Naumovski N, McKune AJ. Measuring Heart Rate Variability Using  
409 Commercially Available Devices in Healthy Children: A Validity and Reliability Study. *EJIHPE.*  
410 2020;10: 390–404. doi:10.3390/ejihpe10010029
- 411 17. Lupo C, Capranica L, Tessitore A. The Validity of the Session-RPE Method for Quantifying Training  
412 Load in Water Polo. *Int J Sports Physiol Perform.* 2014;9: 656–660. doi:10.1123/ijsp.2013-0297
- 413 18. Coelho DB, Mortimer LÁ, Condessa LA, Morandi RF, Oliveira BM, Marins JCB, et al. Intensidade de  
414 jogos de futebol de uma competição real e entre jogadores de diferentes posições táticas. *Rev*  
415 *Bras Cineantropom Desempenho Hum.* 2011;13: 341–347. doi:10.5007/1980-  
416 0037.2011v13n5p341
- 417 19. Abbott W, Exall Z, Walsh L, Clifford T. Menstrual Cycle and Situational Match Variables: Effects on  
418 Well-Being in Professional Female Soccer Players. *Res Q Exerc Sport.* 2024;95: 688–696.  
419 doi:10.1080/02701367.2023.2298443
- 420 20. Carmichael MA, Thomson RL, Moran LJ, Wycherley TP. The Impact of Menstrual Cycle Phase on  
421 Athletes' Performance: A Narrative Review. *IJERPH.* 2021;18: 1667. doi:10.3390/ijerph18041667
- 422 21. Lakens D. Calculating and reporting effect sizes to facilitate cumulative science: a practical primer  
423 for t-tests and ANOVAs. *Front Psychol.* 2013;4. doi:10.3389/fpsyg.2013.00863
- 424 22. Barba-Moreno L, Cupeiro R, Romero-Parra N, Janse De Jonge XAK, Peinado AB. Cardiorespiratory  
425 Responses to Endurance Exercise Over the Menstrual Cycle and With Oral Contraceptive Use. *J*  
426 *Strength Cond Res.* 2022;36: 392–399. doi:10.1519/JSC.0000000000003447
- 427 23. Kraemer RR, Francois M, Castracane VD. Estrogen mediation of hormone responses to exercise.  
428 *Metabolism.* 2012;61: 1337–1346. doi:10.1016/j.metabol.2012.03.009
- 429 24. Tostes RC, Nigro D, Fortes ZB, Carvalho MHC. Effects of estrogen on the vascular system. *Braz J*  
430 *Med Biol Res.* 2003;36: 1143–1158. doi:10.1590/S0100-879X2003000900002
- 431 25. Pereira HM, Larson RD, Bembem DA. Menstrual Cycle Effects on Exercise-Induced Fatigability.  
432 *Front Physiol.* 2020;11: 517. doi:10.3389/fphys.2020.00517
- 433 26. Nabo J, Conceição A, Parraca JA, Tomas-Carus P, Batalha N. Comparison of cardiorespiratory  
434 resistance in different menstrual cycle phases in female futsal players. *Apunts Sports Medicine.*  
435 2021;56: 100341. doi:10.1016/j.apunsm.2020.100341
- 436 27. McNulty KL, Elliott-Sale KJ, Dolan E, Swinton PA, Ansdell P, Goodall S, et al. The Effects of Menstrual  
437 Cycle Phase on Exercise Performance in Eumenorrheic Women: A Systematic Review and Meta-  
438 Analysis. *Sports Med.* 2020;50: 1813–1827. doi:10.1007/s40279-020-01319-3

- 439 28. Wiecek M. Menstrual Cycle and Physical Effort. In: Ivanivna Lutsenko O, editor. Menstrual Cycle.  
440 IntechOpen; 2019. doi:10.5772/intechopen.79675
- 441 29. Michelekaki EA, Michaelides M, Govindasamy K, Parpa K. Recreational Female Athletes'  
442 Understanding of and Perceived Impact of the Menstrual Cycle on Physical Performance, Mood,  
443 and Sleeping Behaviour. *Women*. 2023;3: 445–456. doi:10.3390/women3030034
- 444 30. Scott D, Bruinvels G, Norris D, Lovell R. The Dose–Response in Elite Soccer: Preliminary Insights  
445 From Menstrual-Cycle Tracking During the FIFA Women’s World Cup 2019. *Int J Sports Physiol*  
446 *Perform*. 2024;19: 331–339. doi:10.1123/ijsp.2022-0282
- 447 31. Juillard E, Douchet T, Paizis C, Babault N. Impact of the Menstrual Cycle on Physical Performance  
448 and Subjective Ratings in Elite Academy Women Soccer Players. *Sports*. 2024;12: 16.  
449 doi:10.3390/sports12010016
- 450 32. Reilly T. The Menstrual Cycle and Human Performance: An Overview. *Biol Rhythm Res*. 2000;31:  
451 29–40. doi:10.1076/0929-1016(200002)31:1;1-0;FT029
- 452 33. Janse DE Jonge X, Thompson B, Han A. Methodological Recommendations for Menstrual Cycle  
453 Research in Sports and Exercise. *Med Sci Sports Exerc*. 2019;51: 2610–2617.  
454 doi:10.1249/MSS.0000000000002073

## 455 **Supporting Information**

456 **S1 Table. This is the S1 Table Wellness Questionnaire**

457 **S2 Table. This is the S2 Table RPE scale**

458 **S1 Appendix. This is the S1 Appendix file.**

459 **S1 File. Raw data in excel worksheet.**

## Legend

-  level of oestrogen
-  level of progesterone
-  energy level
-  sleep
-  stress level
-  menstrual bleeding
-  reduced/ worse
-  increased/ better
-  1.half of match
-  2.half of match
-  statistically significant in post-hoc test

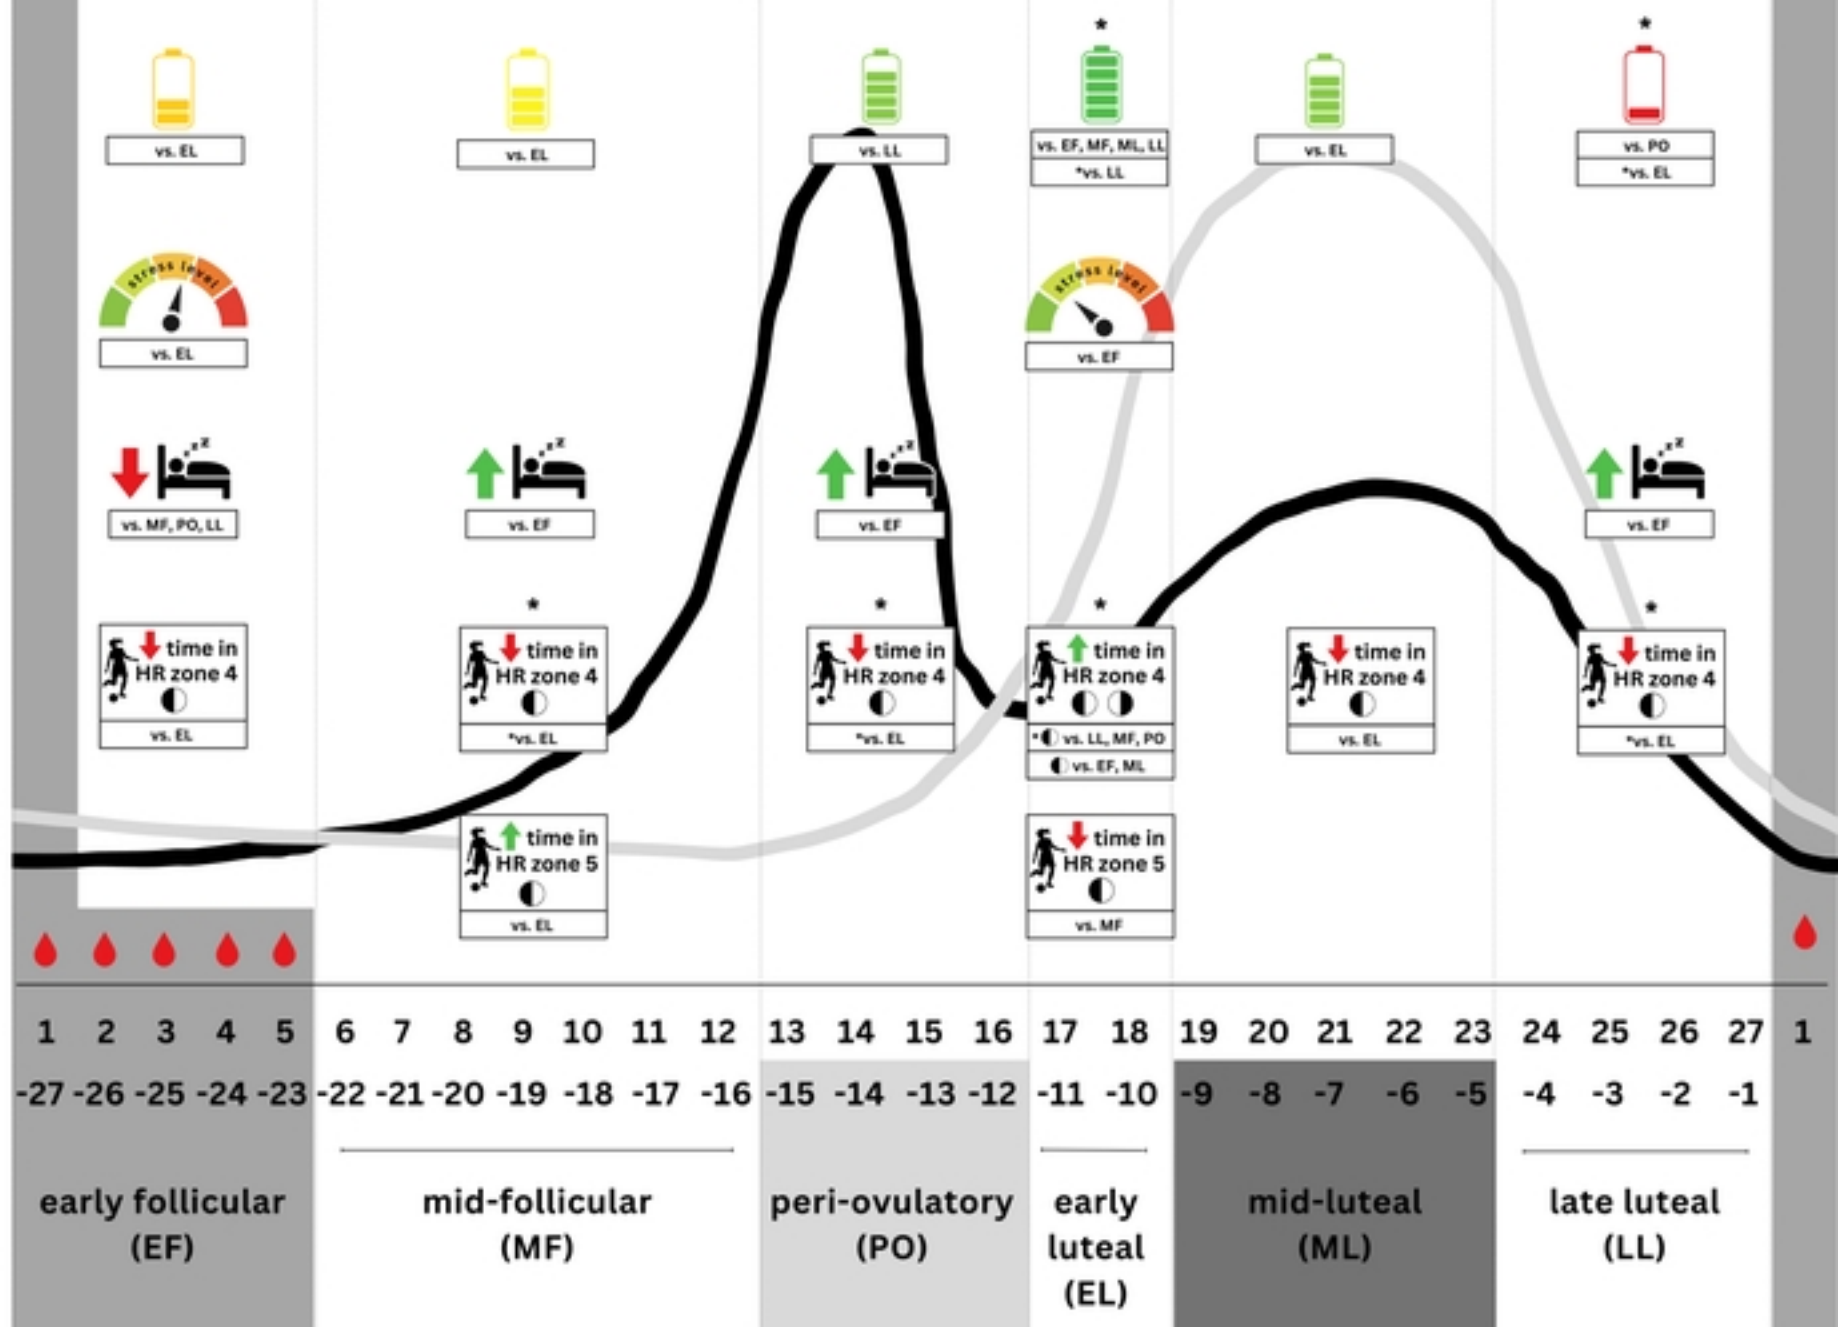

Figure
